# Supplementary material for: Lipoprotein-Associated Phospholipase A2 Activity as Potential Biomarker of Vascular Dementia
Source: MDPI journal article supplement (doi:10.3390/antiox12030597), 2023-02-28
Supplement: s1 [file s1]

SUPPLEMENTARY MATERIALS

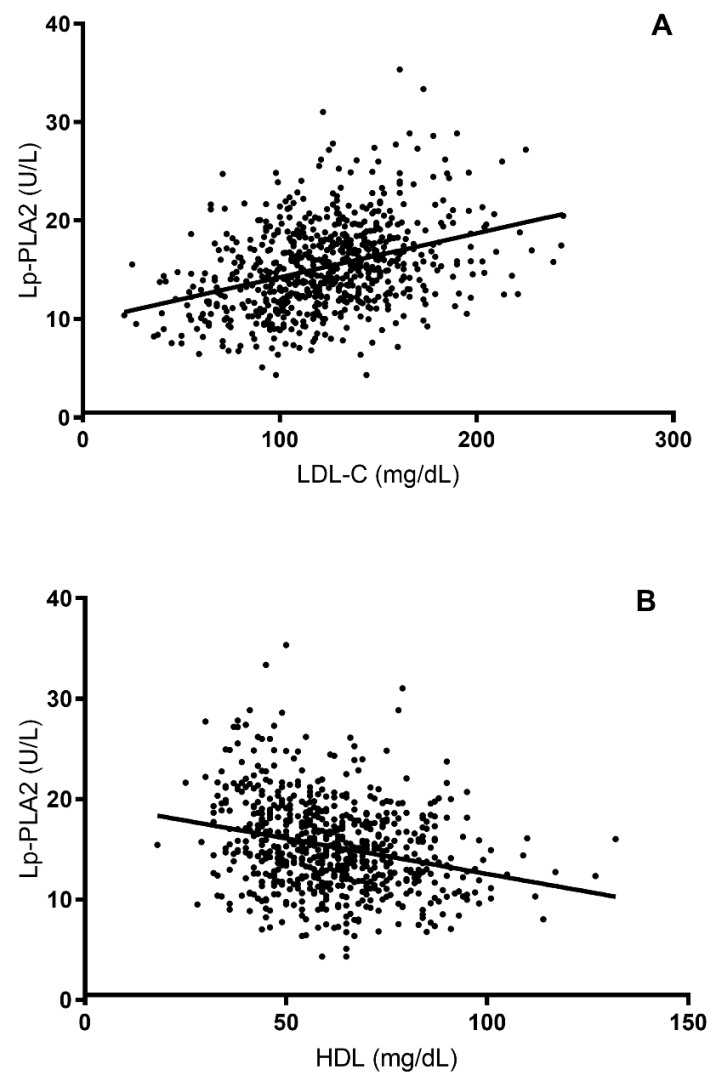

**Figure S1.** Correlation between serum Lp-PLA2 activity levels and LDL-C (A) and HDL-C (B).

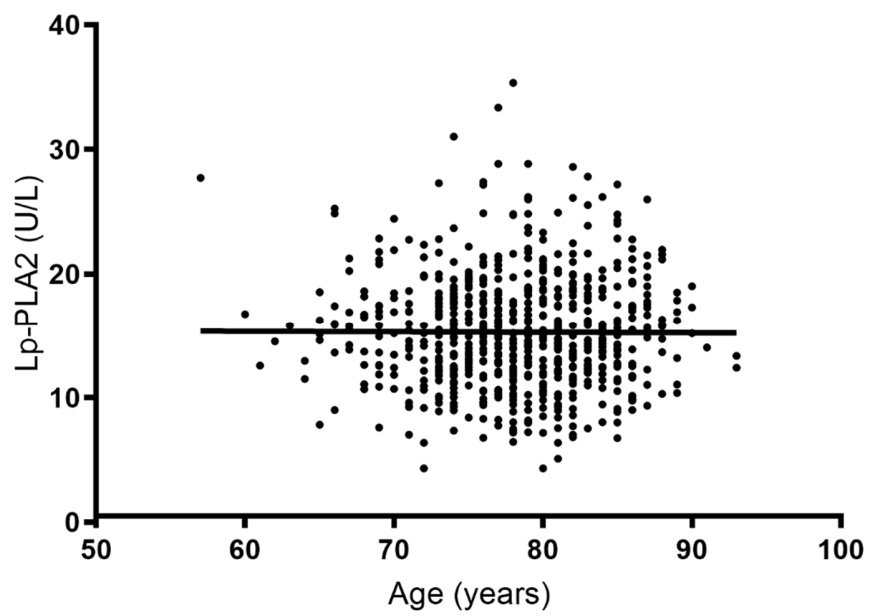

**Figure S2.** Correlation between serum Lp-PLA2 activity levels and age.

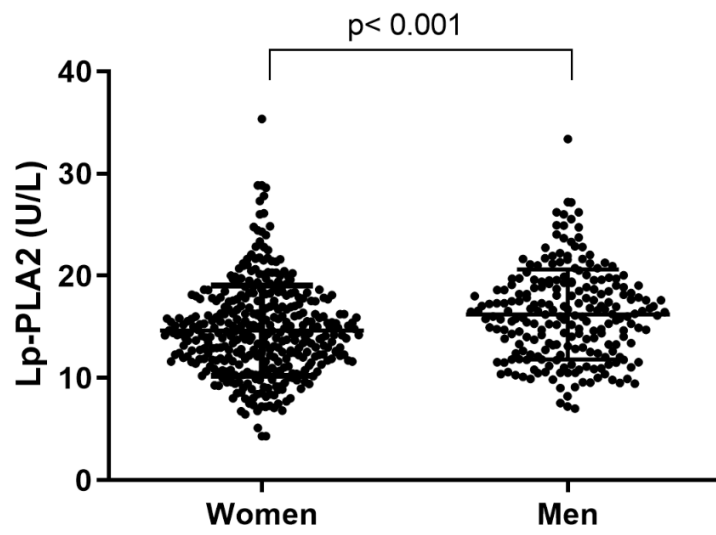

**Figure S3.** Correlation between serum Lp-PLA2 activity levels and sex.

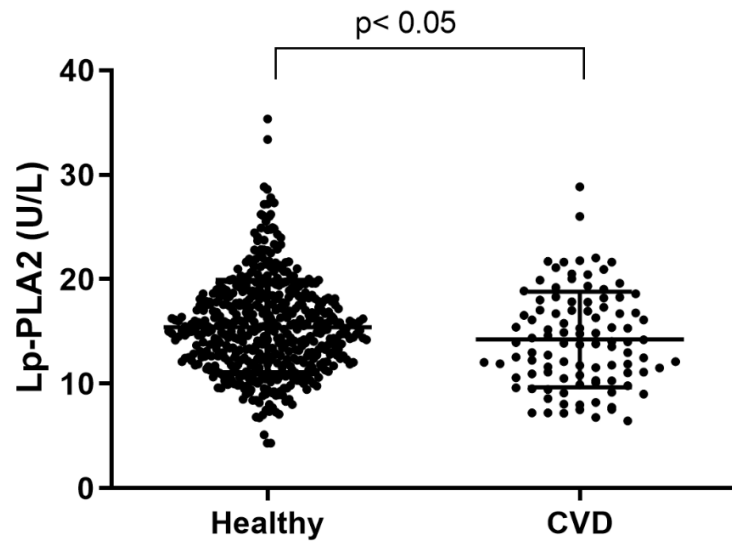

**Figure S4.** Correlation between serum Lp-PLA2 activity levels in healthy individuals and patients with CVD.

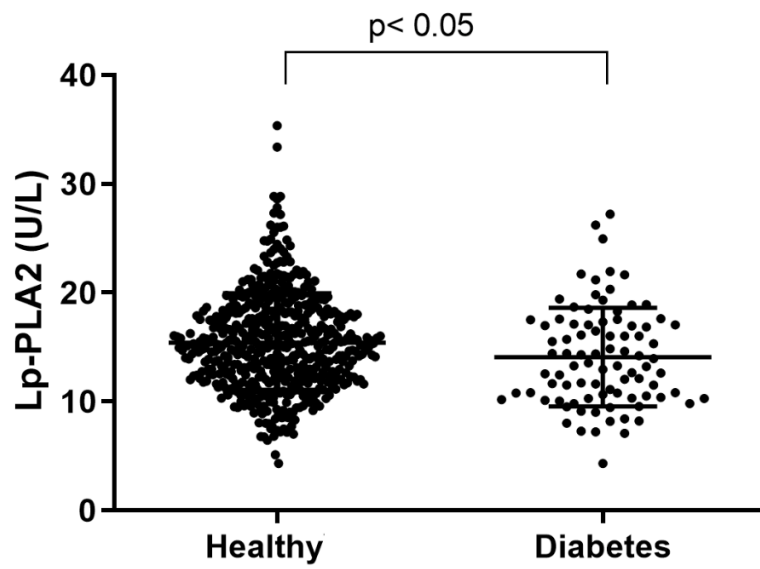

**Figure S5.** Correlation between serum Lp-PLA2 activity levels in healthy individuals and patients with diabetes.

**Supplementary Table 1.** Levels of serum Lp-PLA2 activity in Controls, MCI, AD, VAD, MIXED AD-VAD, and Dementia subtypes after exclusion of younger Controls.

|                         | <b>CONTROLS</b> | <b>AD</b>      | <b>MCI</b>     | <b>VAD</b>    | <b>MIXED<br/>AD-VAD</b> | <b>DEMENTIA<br/>SUBTYPES</b> | <b>ANOVA<br/>(P)</b> |
|-------------------------|-----------------|----------------|----------------|---------------|-------------------------|------------------------------|----------------------|
|                         | <b>(n:86)</b>   | <b>(n:177)</b> | <b>(n:164)</b> | <b>(n:43)</b> | <b>(n:138)</b>          | <b>(n:45)</b>                |                      |
| <b>Lp-PLA2,<br/>U/L</b> | 15 ± 4          | 15 ± 4         | 15 ± 4         | 17 ± 4        | 14 ± 4                  | 15 ± 4                       | 0.036                |
| <b>Age, years</b>       | 80 ± 4          | 80 ± 5         | 78 ± 5         | 80 ± 6        | 79 ± 4                  | 77 ± 6                       | 0.101                |

Continuous variables are expressed as mean ± SEM.
